# Supplementary material
Source: PubMed Central journal article supplement (PMC7497704)

# **The Characterization of an Aggregated Three-Dimensional Cell Culture Model by Multimodal Mass Spectrometry Imaging**

Lucy E. Flint<sup>†</sup>, Gregory Hamm<sup>‡</sup>, Joseph D. Ready<sup>†</sup>, Stephanie Ling<sup>‡</sup>, Catherine J. Duckett<sup>†</sup>, Neil A. Cross<sup>†</sup>, Laura M. Cole<sup>†</sup>, David P. Smith<sup>†</sup>, Richard J. A. Goodwin<sup>‡</sup>, and Malcolm R. Clench<sup>\*†</sup>.

<sup>†</sup>Centre for Mass Spectrometry Imaging, Biomolecular Research Centre, Sheffield Hallam University, Howard Street, Sheffield S1 1WB, United Kingdom

<sup>‡</sup>Pathology, Drug Safety & Metabolism, IMED Biotech Unit, AstraZeneca, Darwin Building, Cambridge Science Park, Milton Road, Cambridge, Cambridgeshire CB4 0WG, United Kingdom

<sup>§</sup>Institute of Infection, Immunity and Inflammation, College of Medical, Veterinary and Life Sciences, University of Glasgow, Glasgow G12 8QQ, UK

\*Email address for corresponding author: [m.r.clench@shu.ac.uk](mailto:m.r.clench@shu.ac.uk)

## Supporting Information

**Supplementary Figure 1. Fluorescently stained image of 3D cell culture.** Viable and necrotic regions identified by Hoechst 33342 and propidium iodide staining. **(a)** Spheroid grown in alginate. Scale 200  $\mu\text{m}$ . **(b)** Aggregated spheroid “aggregoid”. Scale 1000  $\mu\text{m}$ .

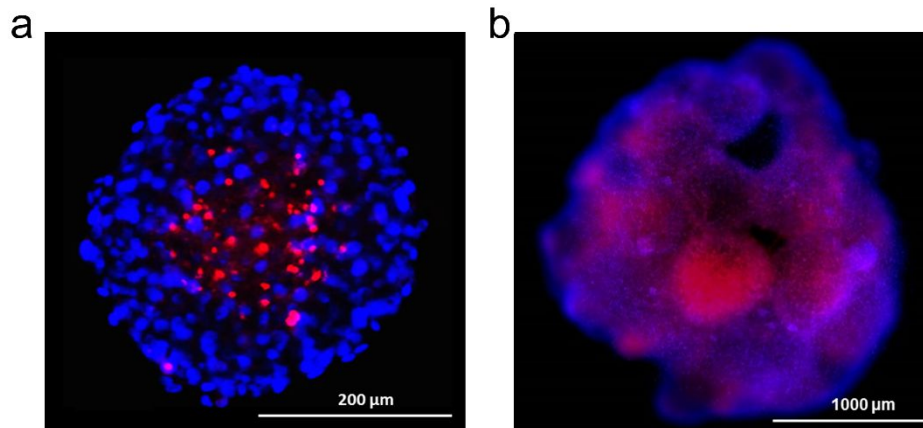

**Supplementary Table 1. Assignments and errors for [M-H]<sup>-</sup> adducts, and discriminatory analysis of metabolites between the core and outer from SCiLS Lab software.** Mass accuracy of identified metabolites with the measured *m/z* values and calculated *m/z* values (< 2.5 ppm). Area under the curve (AUC) determined by receiver operated characteristics (ROC) analysis, represents the discrimination power of *m/z* signal. A perfect discrimination would yield an AUC equal to 0 or 1. An AUC closer to 0.5 defines the *m/z* value less suitable as a univariate criterion. In this case an AUC equal to 0 discriminates the *m/z* value to the core, 1 to the outer.

| <b>Compound name</b> | <b>Ion cluster</b> | <b><i>m/z</i> Measured</b> | <b><i>m/z</i> Calculated</b> | <b>Mass error (ppm)</b> | <b>AUC</b> |
|----------------------|--------------------|----------------------------|------------------------------|-------------------------|------------|
| Pyruvate             | [M-H] <sup>-</sup> | 87.00880                   | 87.00877                     | 0.4                     | 0.240      |
| Lactate              | [M-H] <sup>-</sup> | 89.02440                   | 89.02442                     | 0.2                     | 0.138      |
| Succinate            | [M-H] <sup>-</sup> | 117.01940                  | 117.01930                    | 0.9                     | 0.640      |
| Malate               | [M-H] <sup>-</sup> | 133.01430                  | 133.01425                    | 0.4                     | 0.700      |
| Glutamine            | [M-H] <sup>-</sup> | 145.06190                  | 145.06187                    | 0.2                     | 0.114      |
| Glutamate            | [M-H] <sup>-</sup> | 146.04590                  | 146.04588                    | 0.1                     | 0.396      |
| Citrate              | [M-H] <sup>-</sup> | 191.01980                  | 191.01973                    | 0.4                     | 0.903      |
| FA (18:2)            | [M-H] <sup>-</sup> | 279.23280                  | 279.2330                     | 0.7                     | 0.639      |
| FA (20:4)            | [M-H] <sup>-</sup> | 303.23300                  | 303.23295                    | 0.2                     | 0.564      |
| Glutathione (GSH)    | [M-H] <sup>-</sup> | 306.07650                  | 306.07653                    | 0.1                     | 0.991      |

**Supplementary Figure 2. Average mean spectra of metabolites within the aggregoid regions extracted from SCiLS Lab software.** (a) Combined spectra of core, intermediate and outer region classified from segmentation analysis. (b) Core spectrum. (c) Intermediate spectrum. (d) Outer spectrum. Relative intensity of metabolites for each aggregoid region: (e) Lactate,  $m/z$  89.02440; (f) Glutamine,  $m/z$  145.06290; (g) Citrate,  $m/z$  191.01980; (h) GSH,  $m/z$  306.07650.

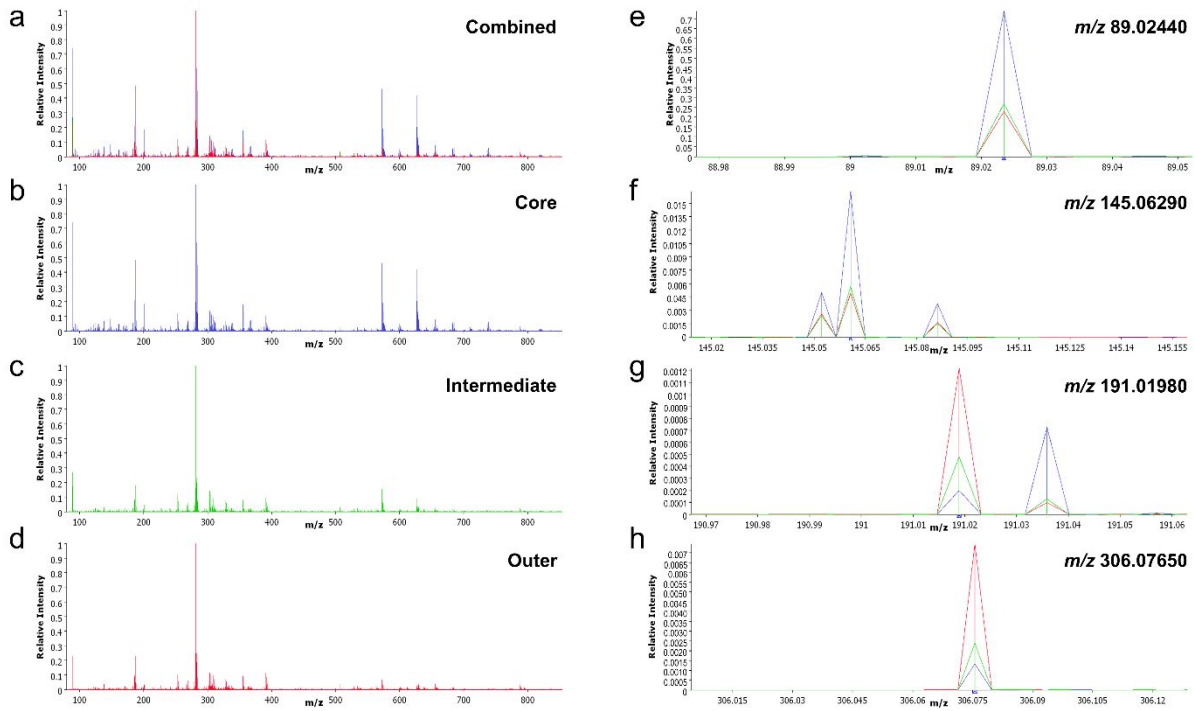

**Supplementary Figure 3. IMC classification and spatial segmentation using HALO™ software. (a)** Regions of core, outer and background were classified from the IMC image analysis of aggregoid. Classification of aggregoid was objective to Glut1 distribution which is localised within the core. **(b)** Spatial segmentation of each protein marker to determine percentage positive cells. From top left to bottom right: Pan-CK, E-Cadherin, Glut1, Ki-67, TNC, pS6,  $\gamma$ H2AX, pHH3, DNA.

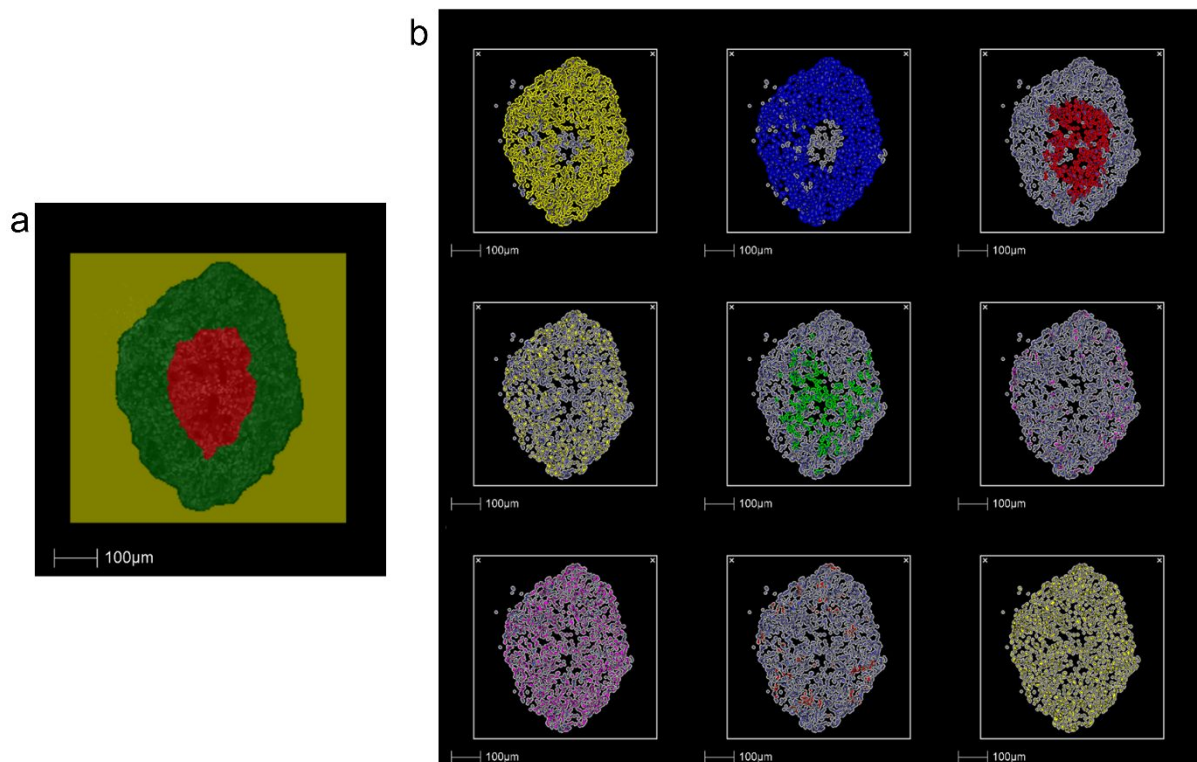

Supplement: ac0c02389_si_001.pdf [file ac0c02389_si_001.pdf]
